# Supplementary material
Source: PubMed Central journal article supplement (PMC5573657)

**Fig E1**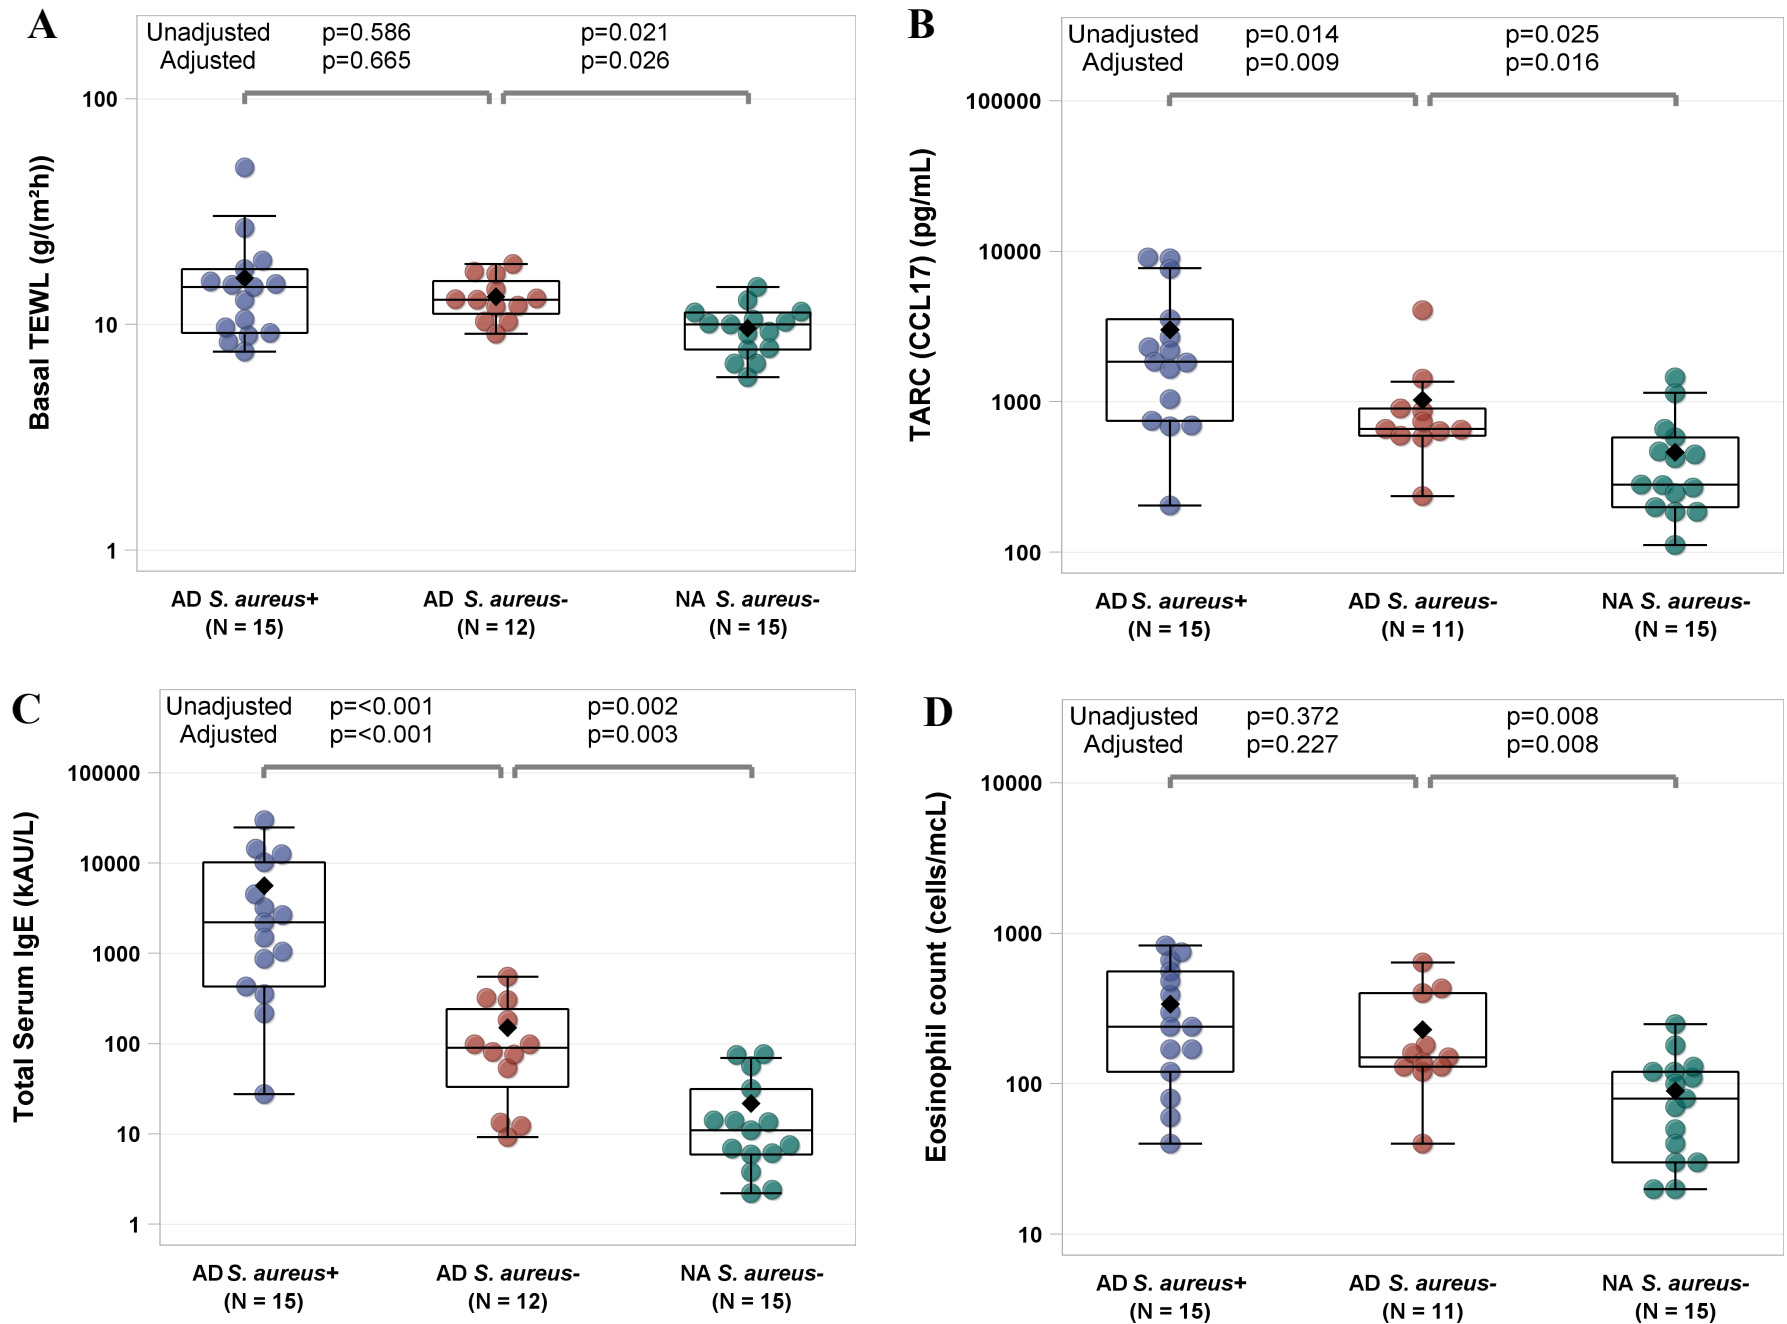

Supplement: NIHMS856099-supplement-Supp_Fig_S1.pdf [file NIHMS856099-supplement-Supp_Fig_S1.pdf]
